# Supplementary material for: Recent loss of the Dim2 DNA methyltransferase decreases mutation rate in repeats and changes evolutionary trajectory in a fungal pathogen
Source: PubMed Central journal article supplement (PMC8016269; doi:10.1371/journal.pgen.1009448), 2021-03-22

**A**

original sequences

1000

2000

3000

native

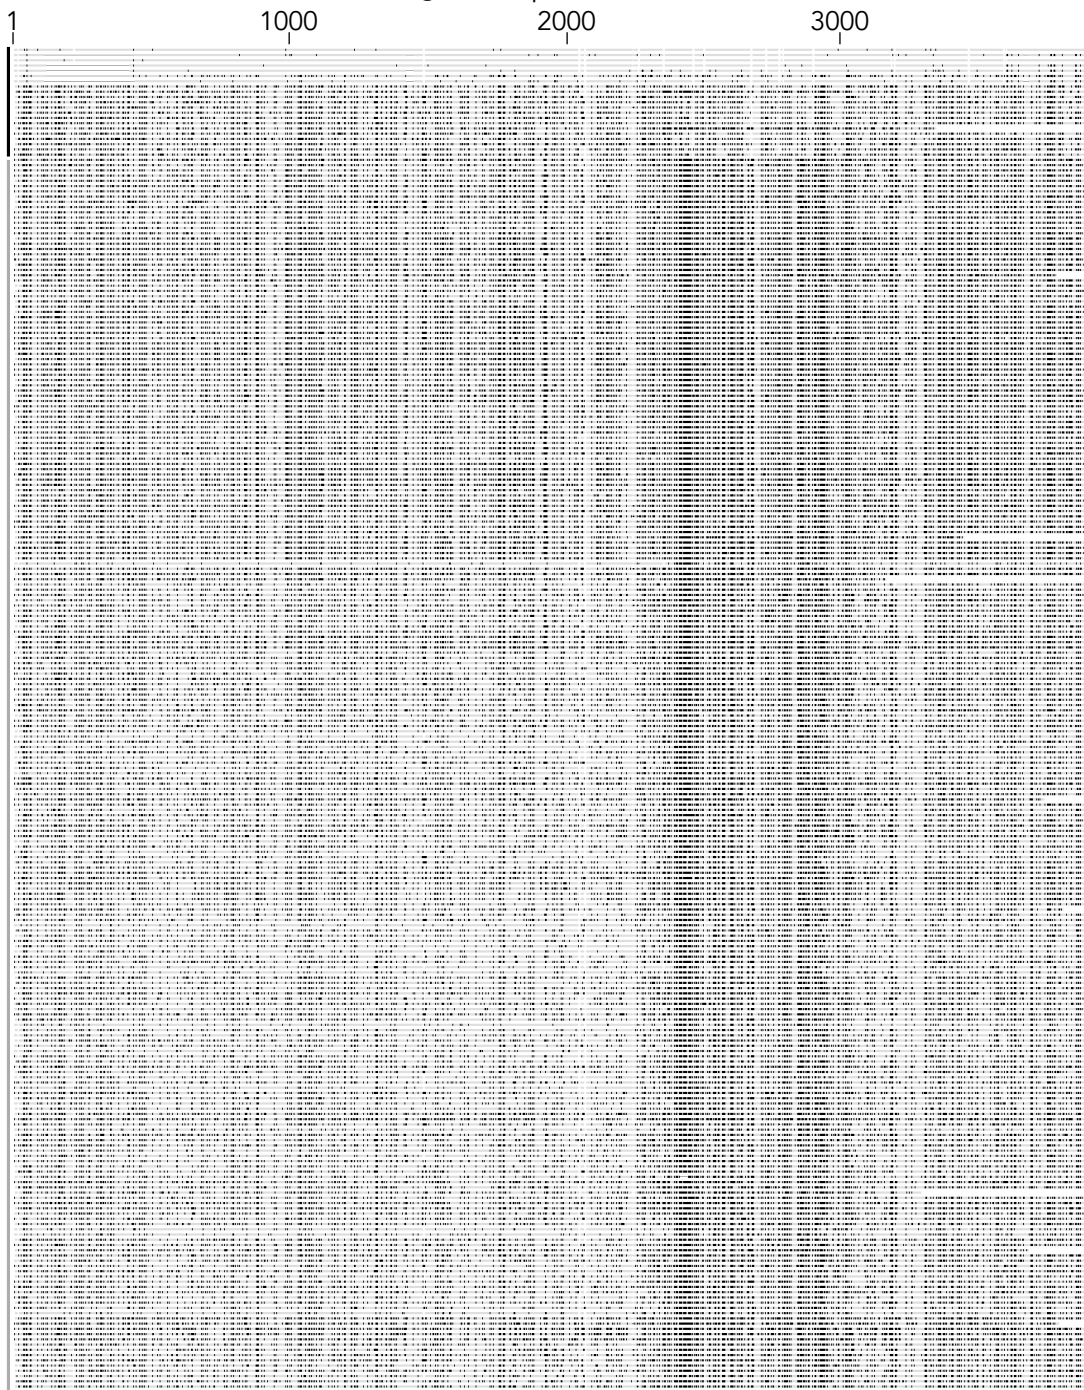functional  
recently  
mutated

non-functional

functional

recently  
mutated

non-functional

non-native

**B**

'deRIPed' sequences

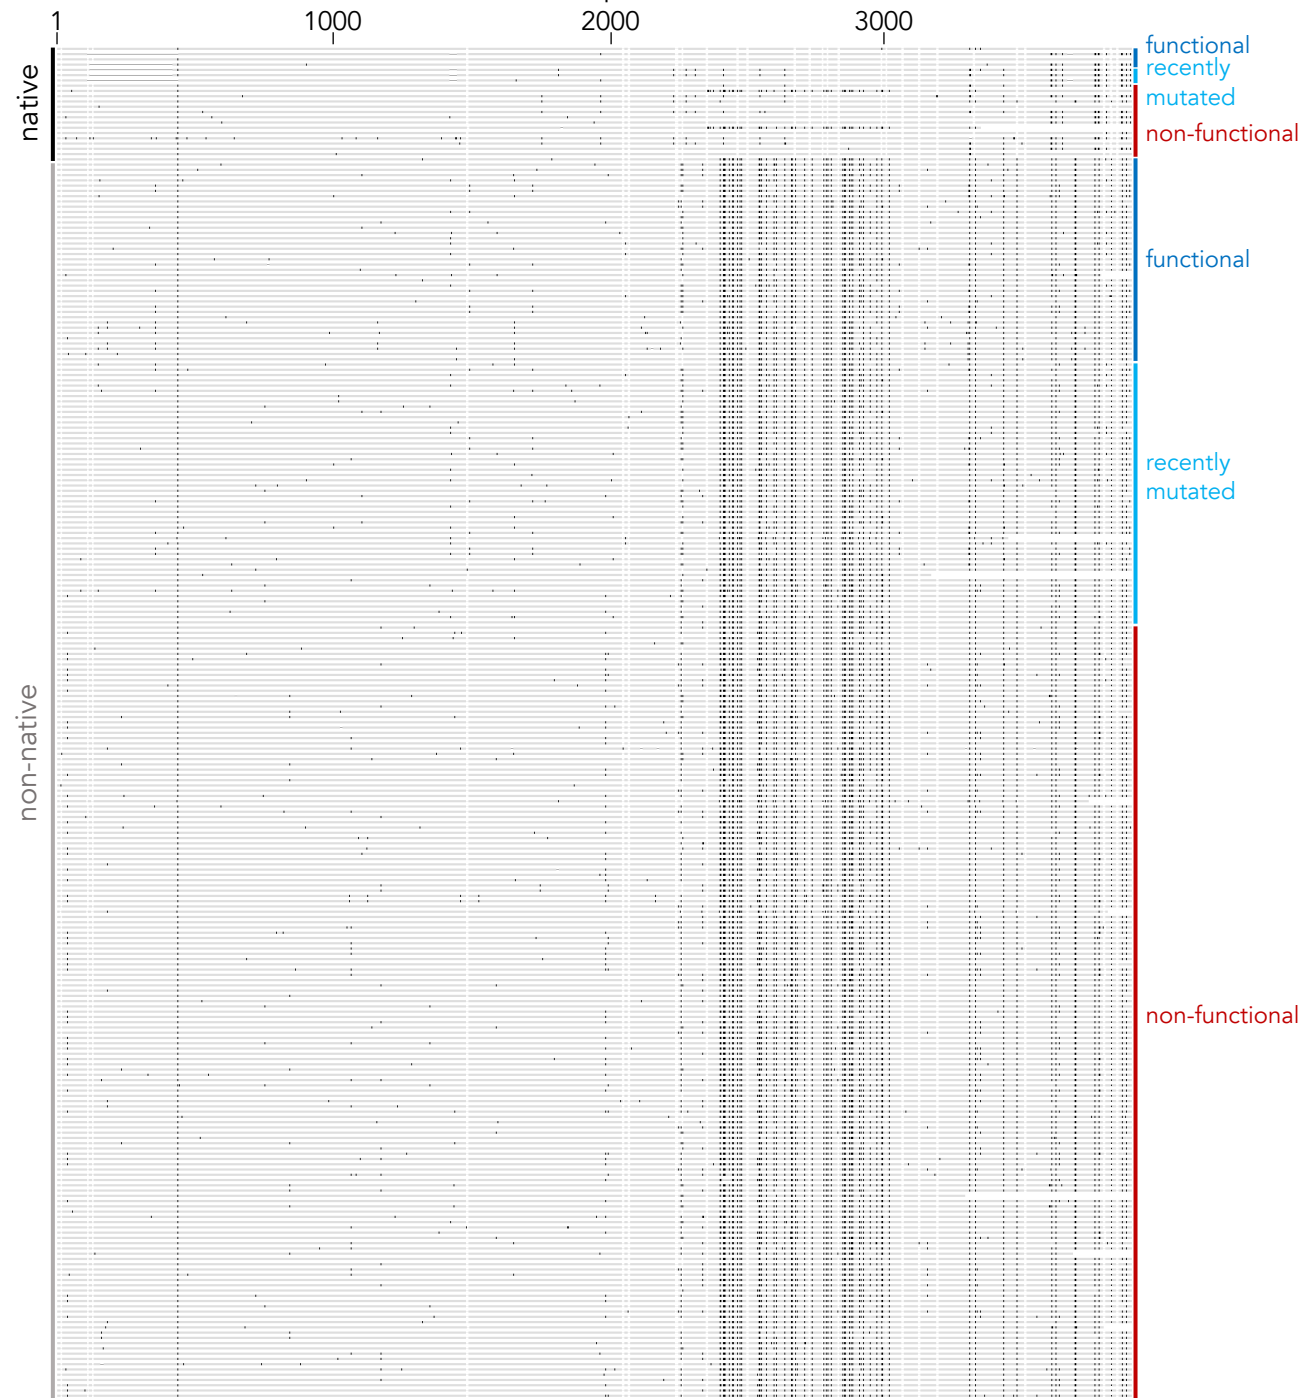

Supplement: pgen.1009448.s002.pdf [file pgen.1009448.s002.pdf]
