# Supplementary material for: Recent loss of the Dim2 DNA methyltransferase decreases mutation rate in repeats and changes evolutionary trajectory in a fungal pathogen
Source: PubMed Central journal article supplement (PMC8016269; doi:10.1371/journal.pgen.1009448), 2021-03-22
Supplement: pgen.1009448.s004.pdf [file pgen.1009448.s004.pdf]

**A***Zt10Δdim2*

Zt10 #8 #68 #101 #125 #135 #141 #146

 kb  
 10  
 8  
 6  
 5  
 4  
 3.5  
 3  
 2.5  
 2  
 1.5
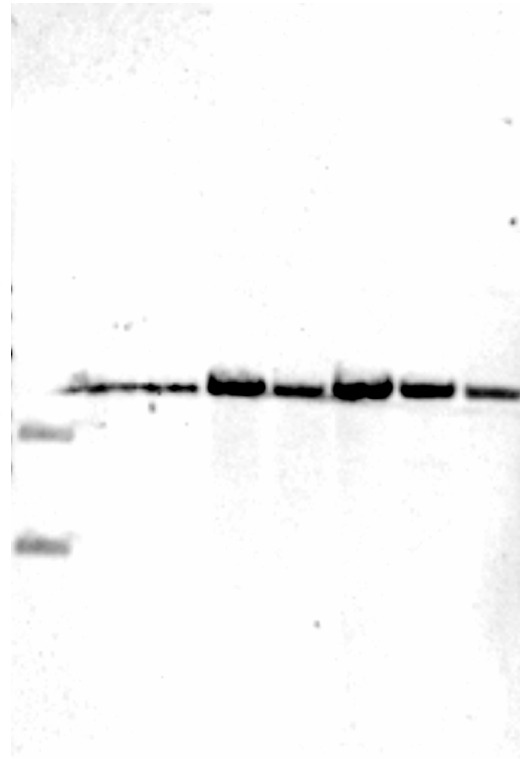

Enzyme *Sall*  
 Zt10 2027 bp  
 Zt10ΔZtdim2 4815 bp

**B***Zt09::dim2*

#1 #10 #49 #63 #84 Zt09

 kb  
 10  
 8  
 6  
 5  
 4  
 3.5  
 3  
 2.5  
 2  
 1.5
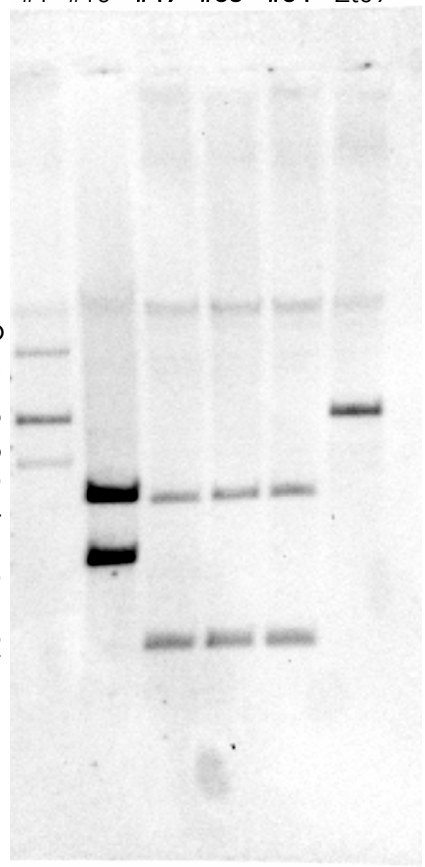

Enzyme *NcoI*  
 Zt09 7122 bp  
 Zt09::Ztdim2 4176 bp
