# Supplementary material for: Recent loss of the Dim2 DNA methyltransferase decreases mutation rate in repeats and changes evolutionary trajectory in a fungal pathogen
Source: PubMed Central journal article supplement (PMC8016269; doi:10.1371/journal.pgen.1009448), 2021-03-22
Supplement: pgen.1009448.s011.pdf [file pgen.1009448.s011.pdf]

Dim2

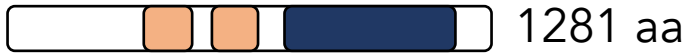

Dnmt5

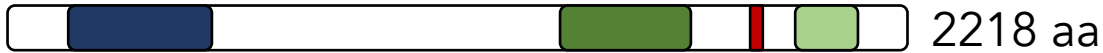

Rid

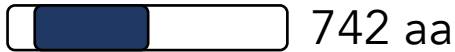

 DNA methyltransferase domain

 BAH domain

 Helicase (SNF2-like)

 Helicase C-terminal

 Zinc finger, RING-type
